# Supplementary material for: Diversity of Sinorhizobium (Ensifer) meliloti Bacteriophages in the Rhizosphere of Medicago marina: Myoviruses, Filamentous and N4-Like Podovirus
Source: PubMed Central journal article supplement (PMC6992544; doi:10.3389/fmicb.2020.00022), 2020-01-24
Supplement: Image_1.pdf [file Image_1.pdf]

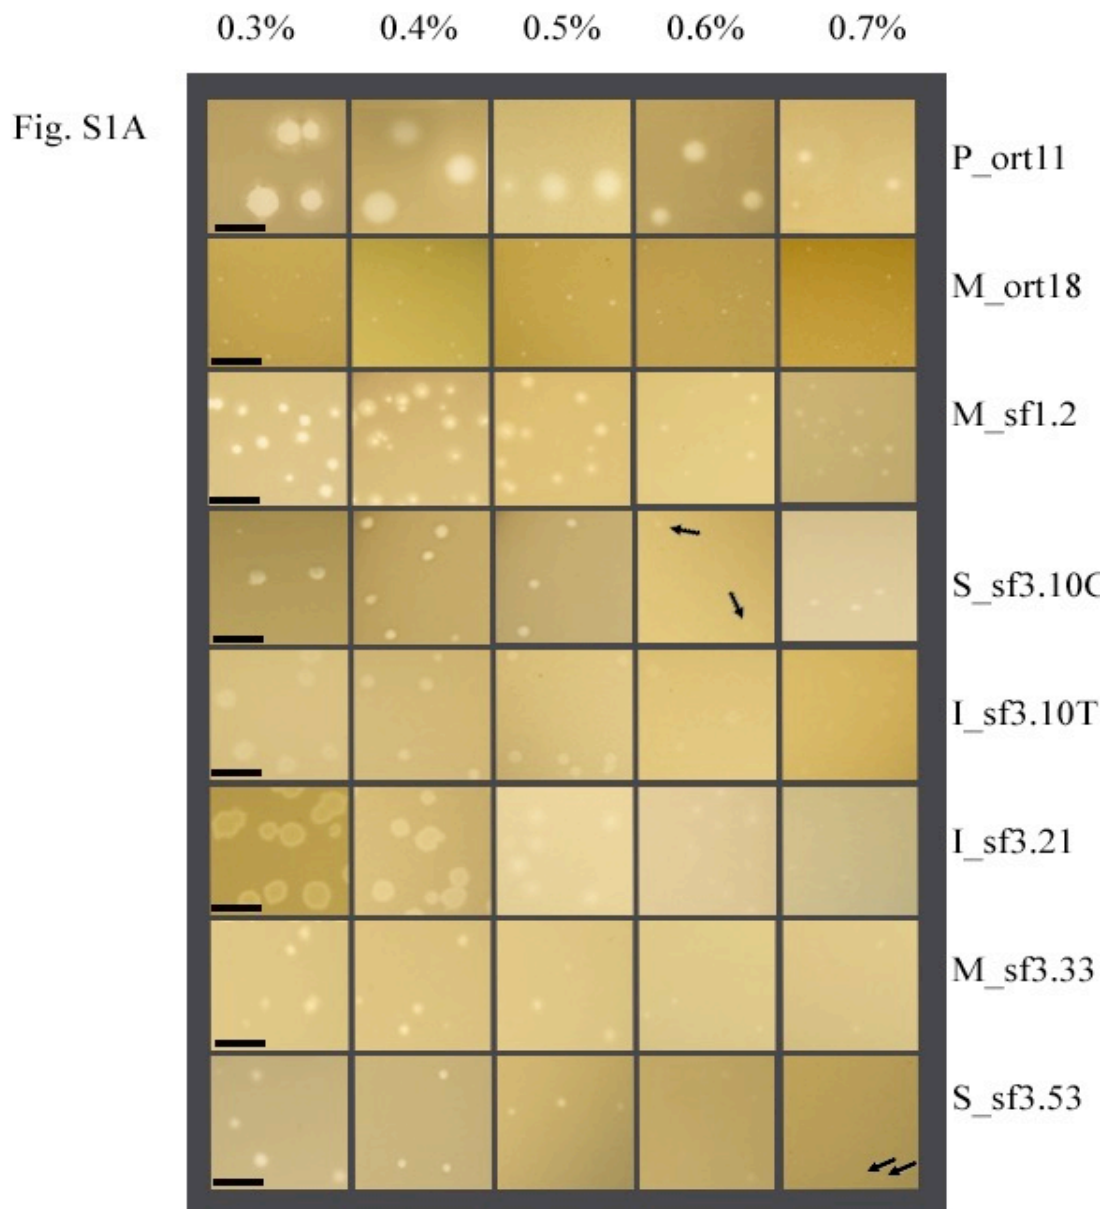

Fig. S1B

| Phage     | Size (mm) of plaques on increasing percentage (wt/v) of top TY-agar |          |           |           |           |
|-----------|---------------------------------------------------------------------|----------|-----------|-----------|-----------|
|           | 0.3%                                                                | 0.4%     | 0.5%      | 0.6%      | 0.7%      |
| P_ort11   | 2.45±0.6                                                            | 2.2±0.4  | 0.35±0.9  | 1.3±0.4   | 1.05±0.07 |
| M_ort18   | 0.55±0.3                                                            | 0.55±0.3 | 0.45±0.2  | 0.35±0.2  | 0.3±0.2   |
| M_sf1.2   | 1.05±0.2                                                            | 0.8±0.5  | 0.75±0.5  | 0.6±0.4   | 0.45±0.4  |
| S_sf3.10C | 1.95±0.07                                                           | 1.4±0.1  | 1.05±0.07 | 1.15±0.07 | 0.8±0.2   |
| I_sf3.10T | 1.6±0.4                                                             | 0.9±0.1  | 0.95±0.2  | 0.95±0.2  | 0.7±0.2   |
| I_sf3.21  | 1.75±0.3                                                            | 1.6±0.5  | 1.25±0.3  | 0.9±0.1   | 0.6±0.01  |
| M_sf3.33  | 0.8±0.5                                                             | 0.65±0.5 | 0.6±0.2   | 0.15±0.07 | 0.1±0.01  |
| S_sf3.53  | 1±0.1                                                               | 0.8±0.1  | 0.7±0.2   | 0.3±0.1   | 0.1±0.01  |

Supplementary Figure S1. Phage-plaques sizes on increasing percentages of TY-agar (% w/v) in the top lawn overlays. Bars, 4 mm. (A) photographs of plaques (B) sizes of them in mm. Arrows indicate very small plaques.
