# Supplementary material for: Diversity of Sinorhizobium (Ensifer) meliloti Bacteriophages in the Rhizosphere of Medicago marina: Myoviruses, Filamentous and N4-Like Podovirus
Source: PubMed Central journal article supplement (PMC6992544; doi:10.3389/fmicb.2020.00022), 2020-01-24
Supplement: Image_2.pdf [file Image_2.pdf]

Fig. S2

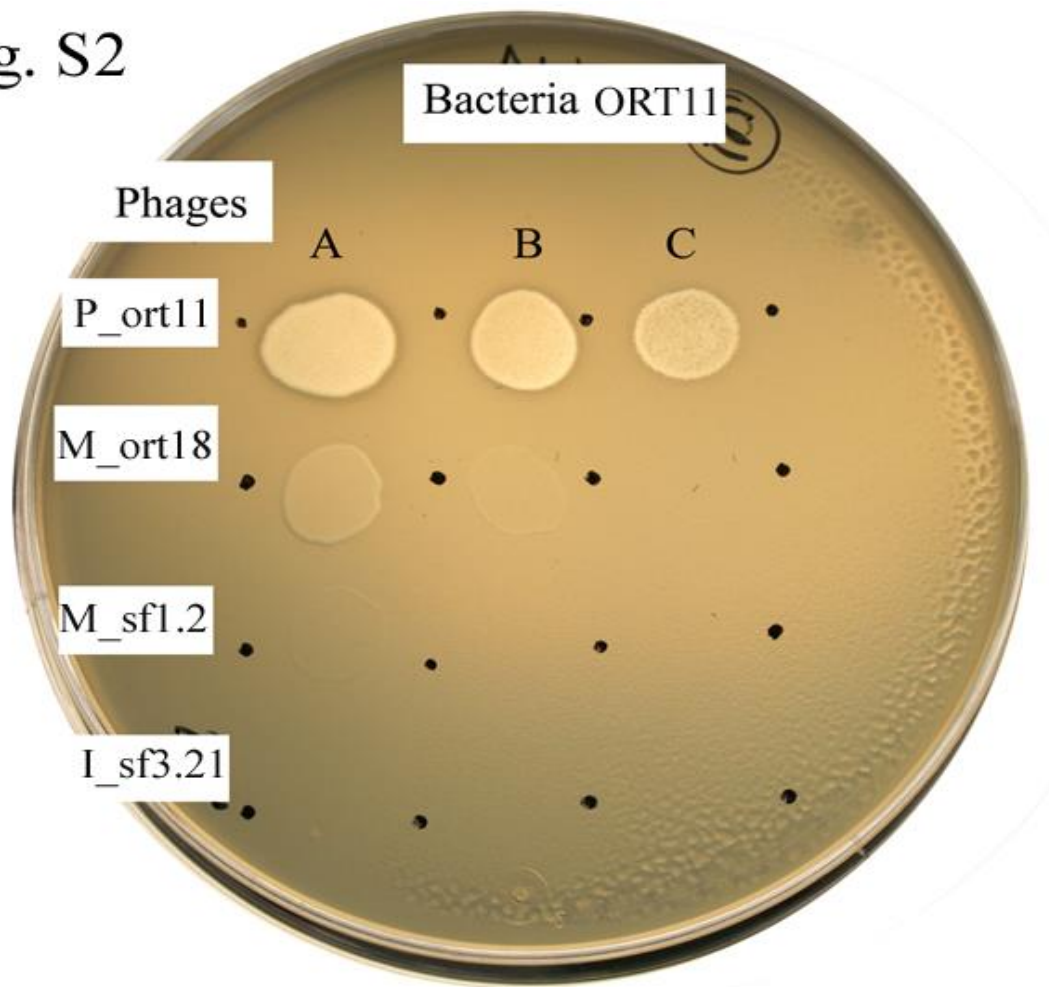

**Supplementary Figure S2. Host range of bacteria *Sinorhizobium meliloti* ORT11 to phages P\_ort11, M\_ort18, M\_sf1.2, and I\_sf3.21.** Bacterial lawns were propagated by adding 200  $\mu$ l of overnight culture to the 0.4% (wt/v) top-TY agar and pouring onto a solid TY plate. After 15 min, 10  $\mu$ l of droplets of lysates were added without dilute (A), 10 times diluted (B), and 100 times diluted (C). Plates were incubated 2 days at 28°C for the presence of lysis plaques
