# Supplementary material for: Diversity of Sinorhizobium (Ensifer) meliloti Bacteriophages in the Rhizosphere of Medicago marina: Myoviruses, Filamentous and N4-Like Podovirus
Source: PubMed Central journal article supplement (PMC6992544; doi:10.3389/fmicb.2020.00022), 2020-01-24
Supplement: Image_3.pdf [file Image_3.pdf]

Fig. S3A

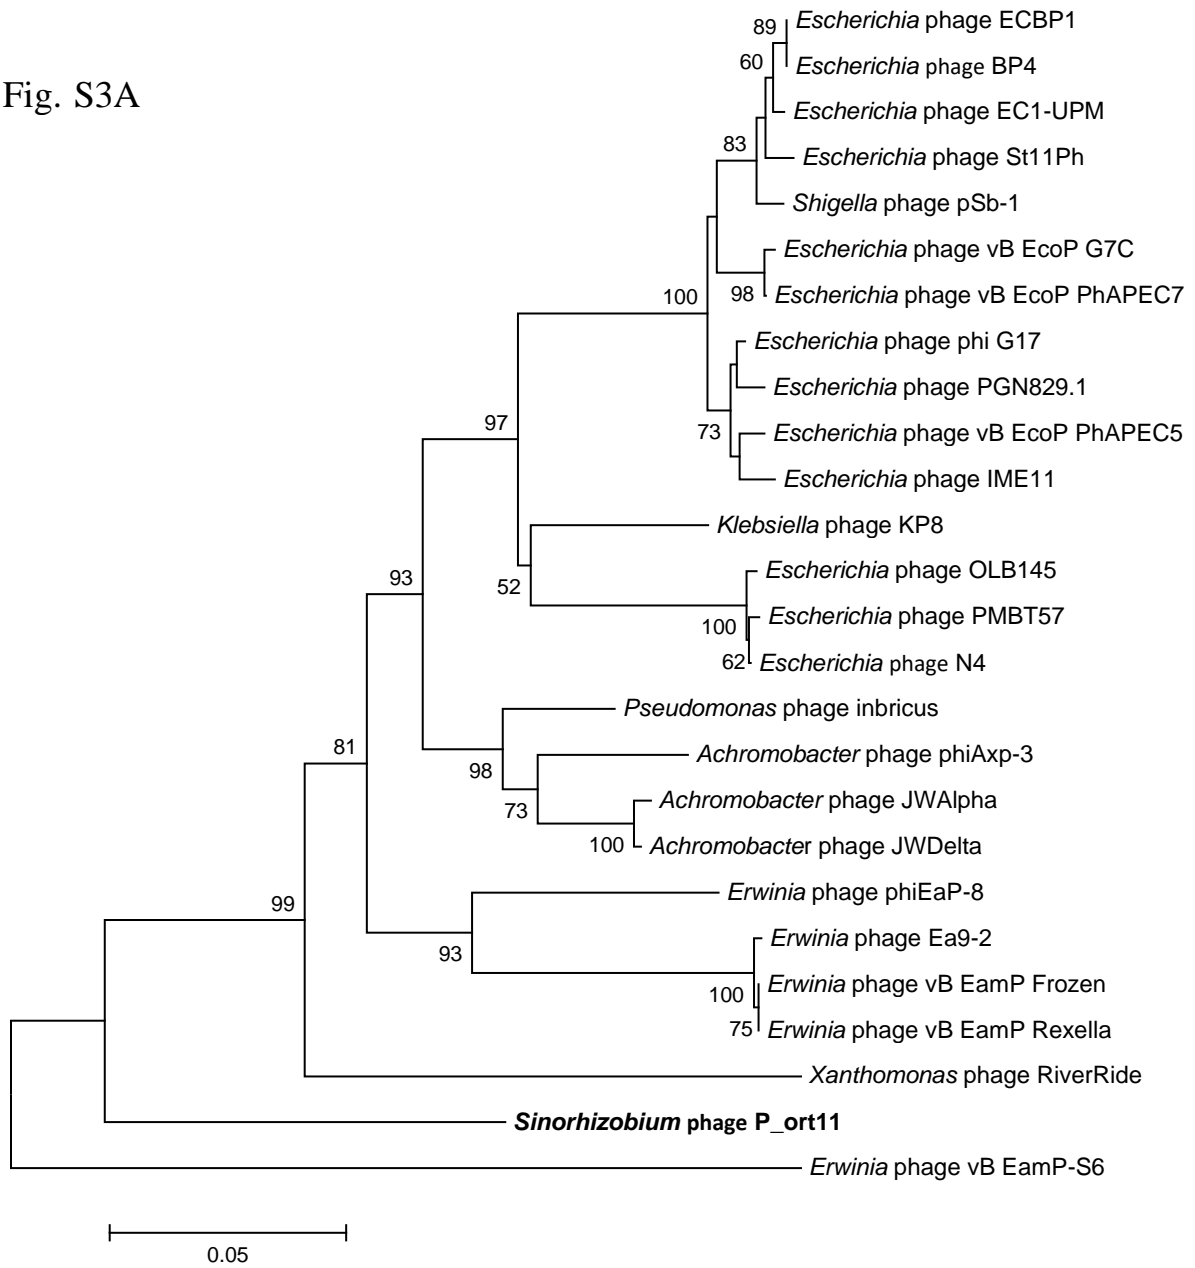

Fig. S3B

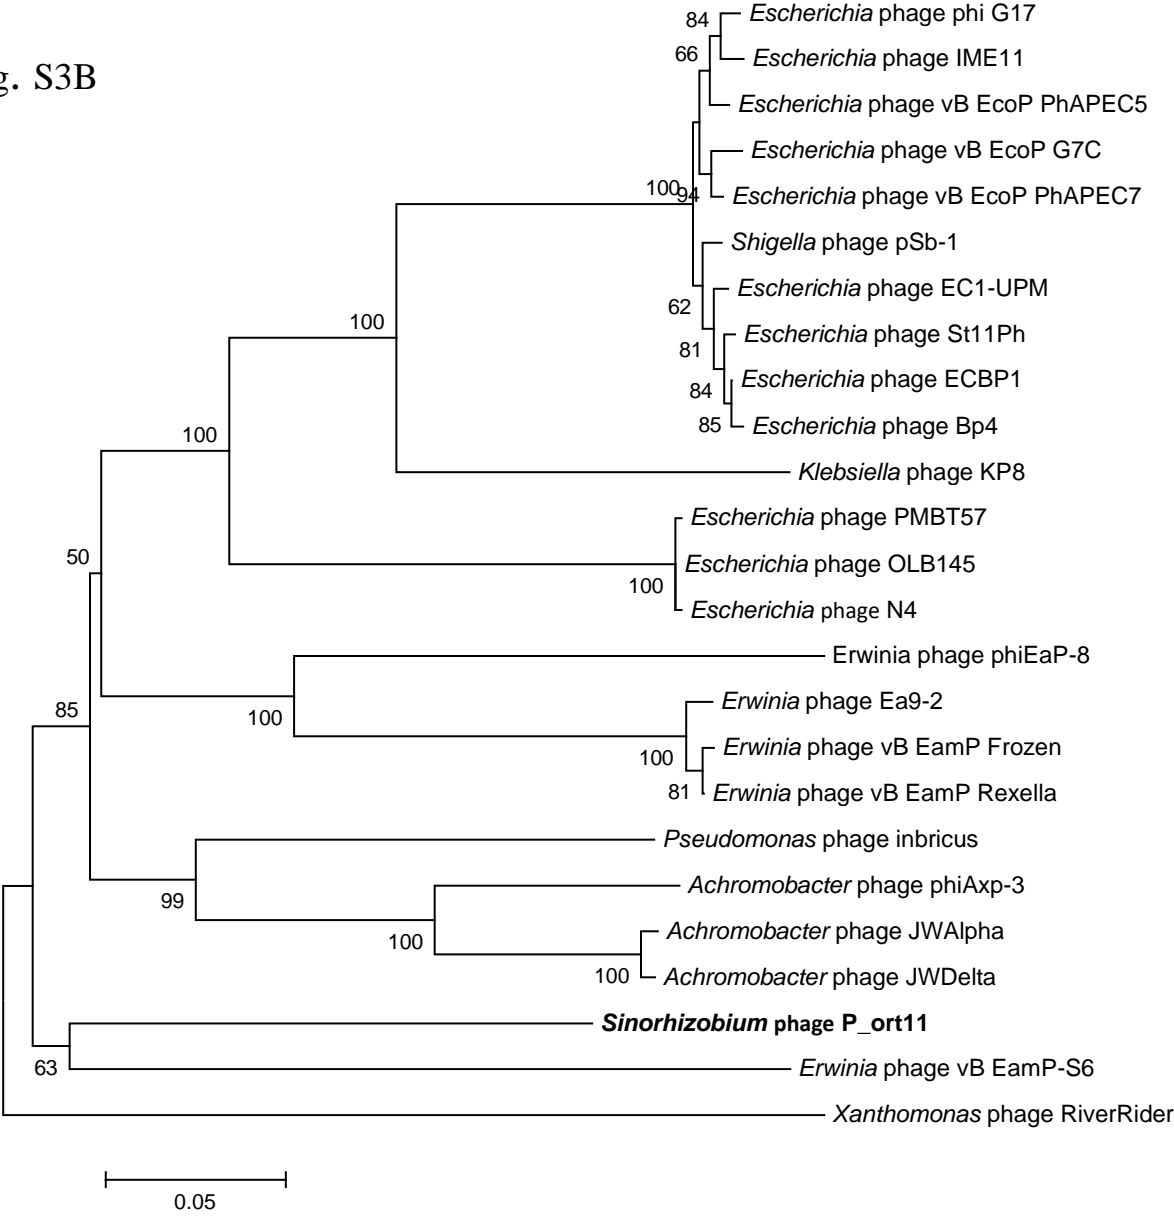

Fig. S3C

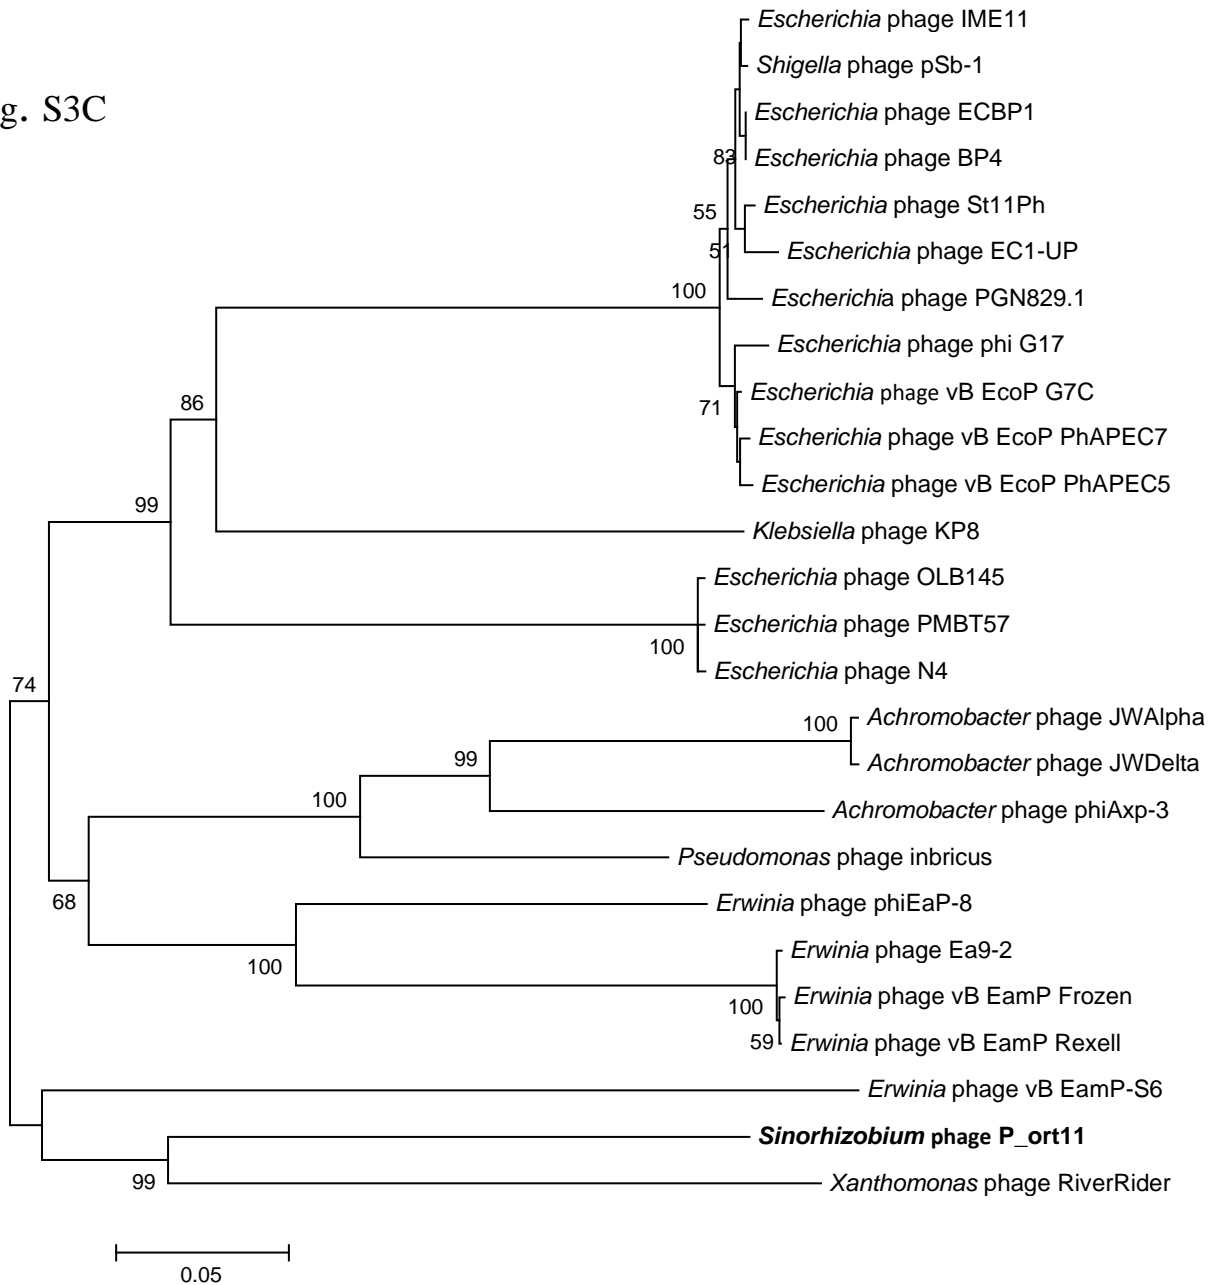

**Supplementary Figure S3. Phylogenetic trees of the major capsid protein (S3A), portal protein (S3B), and DNA polymerase (S3C) of P\_ort11 compared to other N4-like phages.** Neighbour-joining tree was constructed based on ClustalW (MEGA5). Bootstrap values (>50%) are expressed as percentages of 1,000 replicated. Bar, 0.05 amino acid substitutions per site.
